# Supplementary material for: High-efficiency ammonia synthesis via electrochemical nitrate reduction over Co3O4 nanoarrays by B doping
Source: Royal Society of Chemistry journal article supplement (doi:10.1039/d4qi00310a), 2024-01-01
Supplement: d4qi00310a1.pdf [file d4qi00310a1.pdf]

## Electronic Supplementary Information

### Experiment Section

**Materials:** Sodium nitrate ( $\text{NaNO}_3$ ), cobalt nitrate hexahydrate ( $\text{Co}(\text{NO}_3)_2 \cdot 6\text{H}_2\text{O}$ ), boric acid ( $\text{H}_3\text{BO}_3$ ), sodium nitroferricyanide dihydrate, and sulfanilamide were procured from Aladdin Industrial Co. Phosphoric acid ( $\text{H}_3\text{PO}_4$ ), N-(1-naphthyl)ethylenediamine dihydrochloride, and hydrochloric acid ( $\text{HCl}$ ) were acquired from Keshi Chemical Reagent Co. Salicylic acid, sodium nitrite ( $\text{NaNO}_2$ ), and sodium citrate were sourced from Fuchen Chemical Reagent Co. Sodium hydroxide ( $\text{NaOH}$ ) and p-dimethylaminobenzaldehyde were obtained from Macklin and CIVI Chemical Reagent Co., respectively. All chemicals were utilized without additional purification.

**Preparation of B- $\text{Co}_3\text{O}_4$ /TM:** For the synthesis of B- $\text{Co}_3\text{O}_4$ /TM, the hydroxide nanoarray precursor was initially prepared using an electrodeposition method. Employing a titanium mesh (TM,  $1 \times 1 \text{ cm}^2$ ) as the working electrode, a saturated calomel electrode (SCE) as the reference electrode, and Pt as the counter electrode,  $\text{Co}(\text{OH})_2$ /TM was synthesized by electrodepositing in a 0.1 M  $\text{Co}(\text{NO}_3)_2 \cdot 6\text{H}_2\text{O}$  solution (-1.0 V vs. SCE, 120 s). Subsequently, the  $\text{Co}(\text{OH})_2$ /TM was subjected to multiple washes with ethanol and water, followed by drying at 60 °C. The resulting  $\text{Co}(\text{OH})_2$ /TM was immersed in a 10 mM boric acid solution for 1 h, dried and annealed at 400 °C in a tube furnace for 2 h under an Ar atmosphere to obtain self-supporting B-doped  $\text{Co}_3\text{O}_4$  (B- $\text{Co}_3\text{O}_4$ /TM) nanosheet arrays. Additionally,  $\text{Co}_3\text{O}_4$ /TM was synthesized using the same method without soaking in boric acid solution, serving as a comparative sample.

**Characterization:** Morphology information of samples was unveiled through scanning electron microscopy (SEM, ZISS 300, 5.0 kV) and transmission electron microscopy (TEM, JEM-F200, JEOL Ltd.). The crystal structure of as-prepared materials was determined using X-ray diffraction (XRD, Philip D8) with  $\text{Cu K}_\alpha$  source radiation at a scanning rate of  $5^\circ \text{ min}^{-1}$  from 10 to 80°. Chemical compositions were analyzed using X-ray photoelectron spectroscopy (XPS, ESCALAB 250 Xi, Thermo Scientific) using

Al  $K_{\alpha}$  source radiation with an energy of 1486.6 eV. Absorbance data from the spectrophotometer were obtained using Ultraviolet-visible (UV) spectrophotometer (Shimadzu UV-2700).

**Electrochemical measurements:** All electrochemical measurements were conducted within an H-type cell, separated by a treated Nafion 117 membrane, employing a CHI 760E electrochemical workstation (Shanghai, Chenhua). Electrolyte solution (30 mL) consisted of Ar-saturated 0.1 M NaOH, with and without 0.1 M  $\text{NO}_3^-$  ( $\text{NaNO}_3$ ). The working electrode, counter electrode, and reference electrode were B- $\text{Co}_3\text{O}_4/\text{TM}$  ( $0.5 \times 0.5 \text{ cm}^2$ ), Pt, and Hg/HgO, respectively. According to the Nernst equation, all potentials were converted into the potential of the reversible hydrogen electrode (RHE) ( $E_{\text{RHE}} = E_{\text{Hg/HgO}} + 0.059 \times \text{pH} + 0.098 \text{ V}$ ). Linear sweep voltammetry (LSV) curves were measured by CHI 760E scans from 0 to  $-0.8 \text{ V}$  in 0.1 M NaOH with and without 0.1 M  $\text{NO}_3^-$  at a scan rate of  $10 \text{ mV s}^{-1}$ . The potentiostatic experiment was carried out for 1 hour at each given potential, and the stirring speed was 200 rpm. During the experiment, Ar was continuously injected into the cathode chamber. In the cycle test, the potentiostatic test is performed at a stirring speed of 200 rpm at  $-0.7 \text{ V}$  for 1 h, and then the next cycle used fresh electrolytes under the same conditions. All current densities presented in this work are based on the geometric surface area. The sampling method for the stability test is as follows: Before the test, a thin tube was inserted into H-cell and fixed below the electrolyte level. At each sampling time, 1 mL of electrolyte was pipetted into the centrifugal tube for subsequent testing.

**Determination of  $\text{NH}_3$ :** The yields of  $\text{NH}_3$  in the electrolyte were calculated by spectrophotometer using the indophenol blue method. Concretely, 2 mL of the collected electrolyte after electrolysis mixed with 2 mL of 1 M NaOH solution containing 5% salicylic acid and 5% sodium citrate. Then, 1 mL of 0.05 M NaClO and 200  $\mu\text{L}$  of 1 wt% sodium nitroferricyanide dihydrate were dropped in the collected electrolyte solution. The electrolytes of different potential and cycle tests were diluted 40 times, and the electrolytes of stability tests were diluted 200 times in H-cell. After maintained

in the dark for 2 h, the concentration of  $\text{NH}_3$  was identified by UV spectroscopy for a certain wavelength about 655 nm:

$$\text{NH}_3 \text{ yield} = [\text{NH}_3] \times V / (17 \times t \times A)$$

Where  $[\text{NH}_3]$  is the mass concentration,  $V$  is the volume of the cathodic reaction electrolyte,  $t$  is the reduction time, and  $A$  is the area of the working electrode.

$$\text{FE} = (n \times F \times c \times V) / (M \times Q)$$

Where  $F$  is the Faraday constant,  $n$  is the electrons transfer number,  $c$  is the calculated products concentration,  $V$  is the volume of the cathodic reaction electrolyte,  $M$  is the molecular mass of products, and  $Q$  is the total charge during electrosynthesis.

**Determination of  $\text{NO}_2^-$ :** The  $\text{NO}_2^-$  concentration was detected by the Griess test using UV spectrophotometry. The Griess reagent was provided through adding N-(1-naphthyl)ethylenediamine dihydrochloride (0.1 g), sulfanilamide (1.0 g), and  $\text{H}_3\text{PO}_4$  (2.94 mL) in 50 mL  $\text{H}_2\text{O}$ . Typically, 1.0 mL Griess reagent was added to 1.0 mL electrolyte and 2.0 mL  $\text{H}_2\text{O}$ . After maintained for 10 min, the concentration of  $\text{NO}_2^-$  was measured by UV spectroscopy at a wavelength of 540 nm:

$$\text{NO}_2^- \text{ yield} = [\text{NO}_2^-] \times V / (46 \times t \times A)$$

Where  $[\text{NO}_2^-]$  is the mass concentration,  $V$  is the volume of the cathodic reaction electrolyte,  $t$  is the reduction time, and  $A$  is the area of the working electrode.

$$\text{FE} = (n \times F \times c \times V) / (M \times Q)$$

Where  $F$  is the Faraday constant,  $n$  is the electrons transfer number,  $c$  is the calculated products concentration,  $V$  is the volume of the cathodic reaction electrolyte,  $M$  is the molecular mass of  $\text{NO}_2^-$ , and  $Q$  is the total charge during electrosynthesis.

**Determination of  $\text{H}_2$ :** Detection and quantification of  $\text{H}_2$  were executed on a gas chromatograph system (Shimadzu GC-2014C) equipped with flame ionization detectors (FIDs), FID-methanizer, online auto-sampling system, and thermal

conductivity detector.

**NO<sub>3</sub><sup>-</sup> isotopic labelling experiment:** The generated NH<sub>3</sub> was verified by an isotope-labelled tracer experiment using 0.1 M <sup>15</sup>NO<sub>3</sub><sup>-</sup> as a N source. After 1 h of electroreduction at -0.7 V, the electrolyte (2 mL) in the cathodic chamber was neutralized by HCl aqueous solution (1.2 M). After that, the neutralized electrolyte (500 μL) was mixed with deuterium oxide (D<sub>2</sub>O, 50 μL). And the mixture was sealed into a nuclear magnetic resonance (NMR) tube (5 mm in diameter, 600 MHz) for further tests.

**Computational details:** First-principles calculations with spin-polarized were carried out using density functional theory (DFT) performed in the VASP package,<sup>1</sup> and the projector augmented wave (PAW) approach was used to describe the interaction between ionic core and valence electrons with a cutoff of 500 eV. Perdew-Burke-Ernzerhof functional (PBE) with semi-empirical corrections of DFT-D3 were employed to depict exchange-correlation functional effect by general gradient approximation (GGA).<sup>2</sup>

Modeled by the Co<sub>3</sub>O<sub>4</sub> (311) facet with two terminations, the upper two layers were loosened, but the bottom two layers were secured. The spurious interaction was avoided by the 15 Å thickness of the vacuum region. U = 3.32 eV of Co 3d orbitals was used to perform the Hubbard U model.<sup>3</sup> According to the Monkhorst-Pack scheme, 3 × 3 × 1 special k-points were applied to optimize the structural configuration by the Brillouin zone.<sup>4</sup> The force convergence thresholds and total energy are 0.02 eV/Å and less than 1 × 10<sup>-5</sup> eV, respectively. Based on VASPKIT software, DFT results were explained.<sup>5</sup>

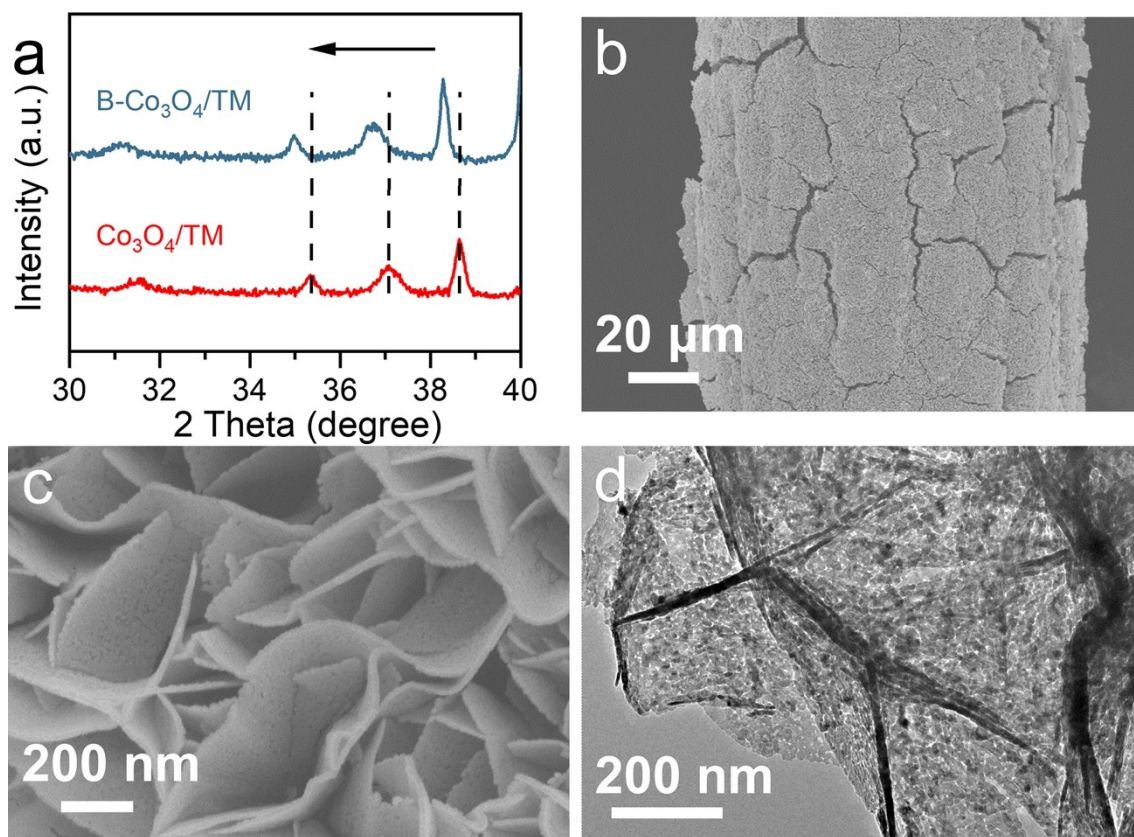

Fig. S1. (a) Partially enlarged XRD patterns of B-Co<sub>3</sub>O<sub>4</sub>/TM and Co<sub>3</sub>O<sub>4</sub>/TM. (b, c) SEM images of Co<sub>3</sub>O<sub>4</sub>/TM. (d) TEM image of Co<sub>3</sub>O<sub>4</sub>.

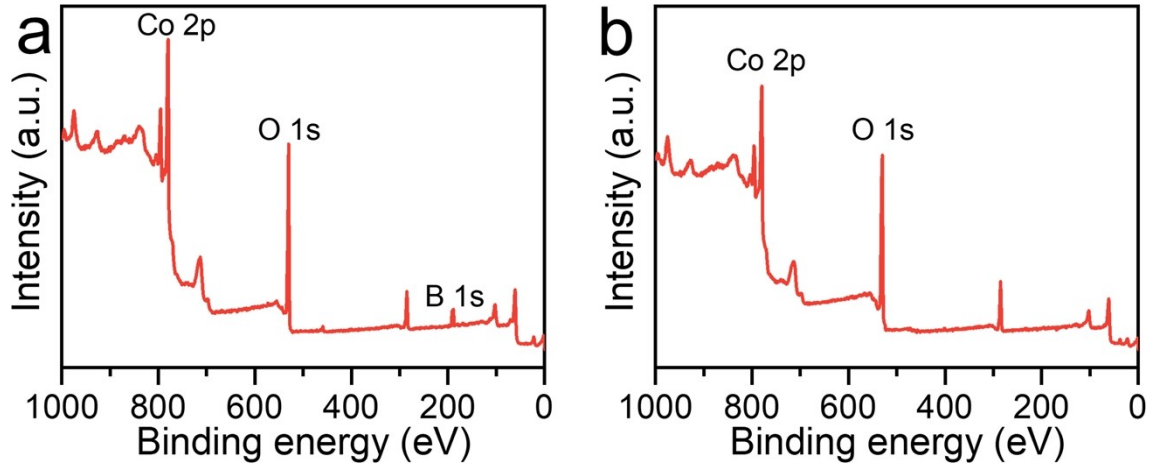

Fig. S2. The full spectra of XPS for (a) B-Co<sub>3</sub>O<sub>4</sub>/TM and (b) Co<sub>3</sub>O<sub>4</sub>/TM.

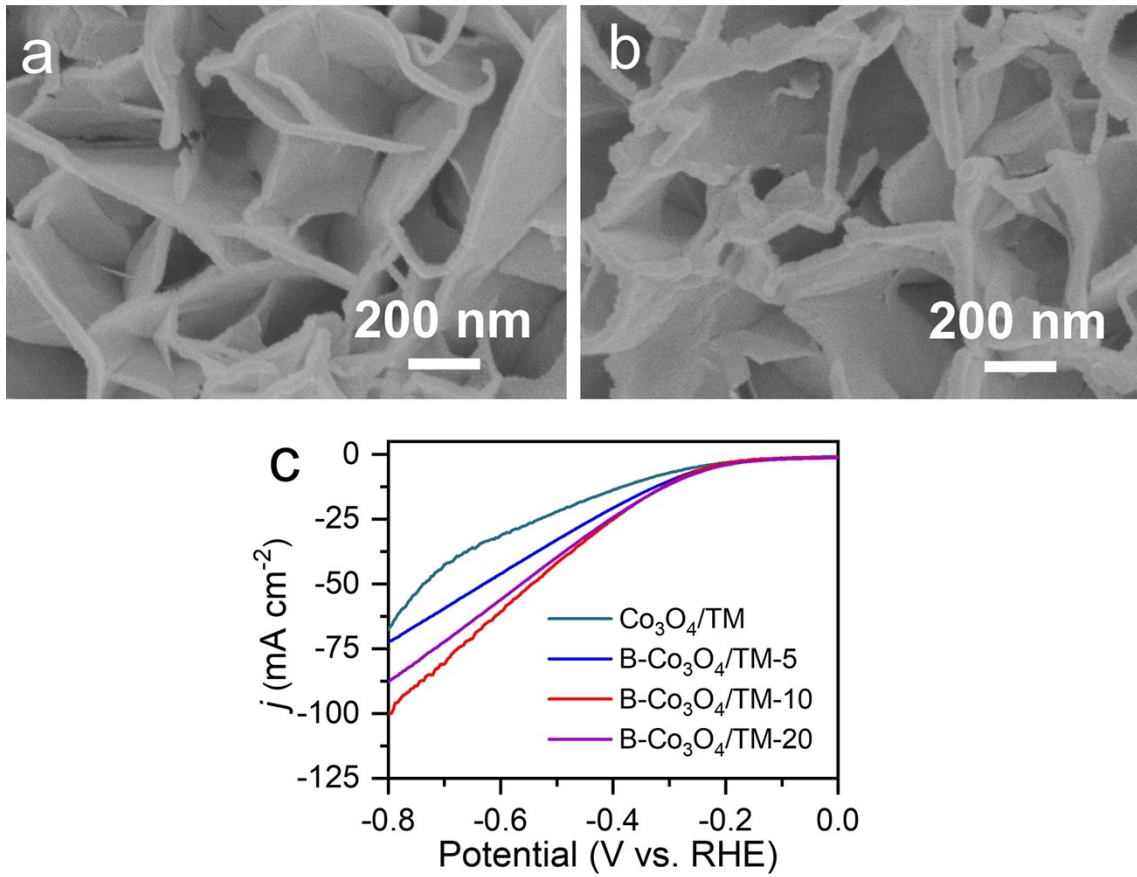

Fig. S3. SEM images of (a) B-Co<sub>3</sub>O<sub>4</sub>/TM-5 and (b) B-Co<sub>3</sub>O<sub>4</sub>/TM-20. (c) LSV curves in 0.1 M NaOH with 0.1 M NO<sub>3</sub><sup>-</sup> for Co<sub>3</sub>O<sub>4</sub>/TM with different B doping amounts.

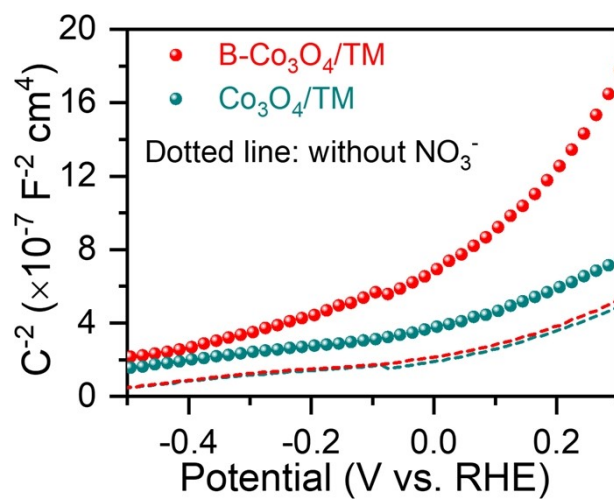

Fig. S4. M-S plots of the B-Co<sub>3</sub>O<sub>4</sub>/TM and Co<sub>3</sub>O<sub>4</sub>/TM with and without NO<sub>3</sub><sup>-</sup>.



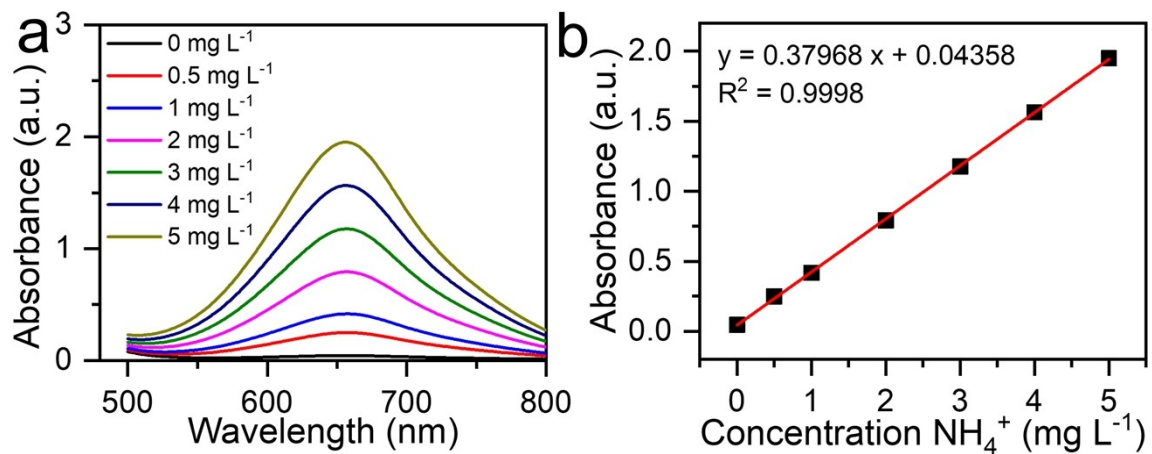

Fig. S5. (a) UV spectra and (b) calibration curve for determining  $\text{NH}_3$ .

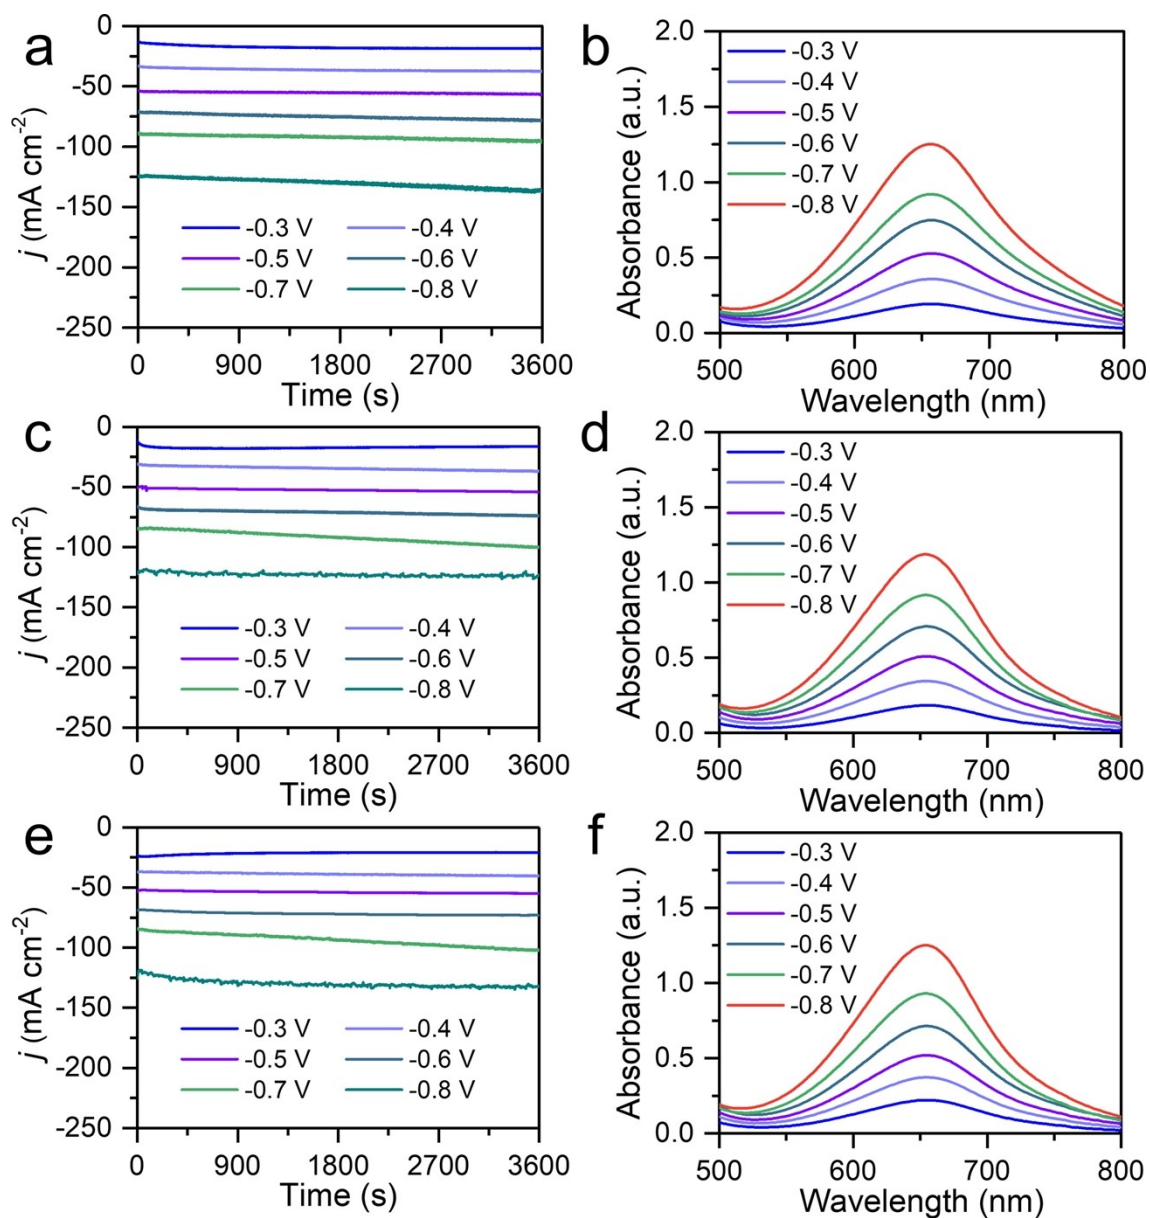

Fig. S6. (a, c, and e) Time-dependent current density curves and (b, d, and f) corresponding UV spectra of B-Co<sub>3</sub>O<sub>4</sub>/TM for the NO<sub>3</sub><sup>-</sup>RR at different potentials.

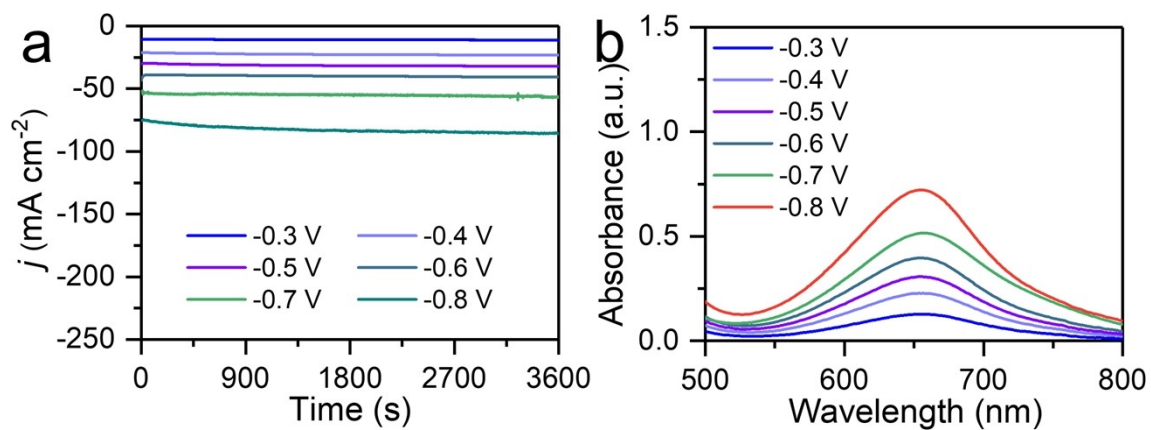

Fig. S7. (a) Time-dependent current density curves and (b) corresponding UV spectra of  $\text{Co}_3\text{O}_4/\text{TM}$  for the  $\text{NO}_3^-$ -RR at different potentials.

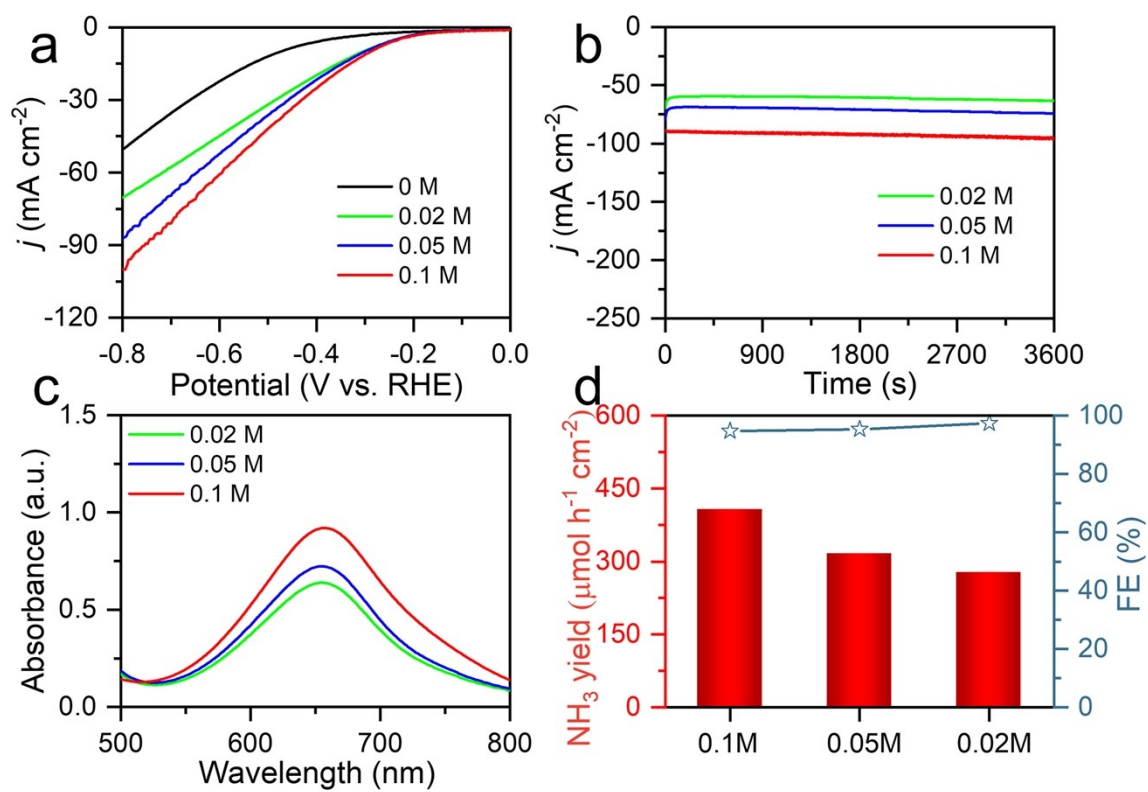

Fig. S8. (a) LSV curves, (b) time-dependent current density curves, (c) corresponding UV spectra, and (d) NH<sub>3</sub> yields and FEs of B-Co<sub>3</sub>O<sub>4</sub>/TM for the NO<sub>3</sub><sup>-</sup>RR in 0.1 M NaOH with different NO<sub>3</sub><sup>-</sup> concentrations at -0.7 V.

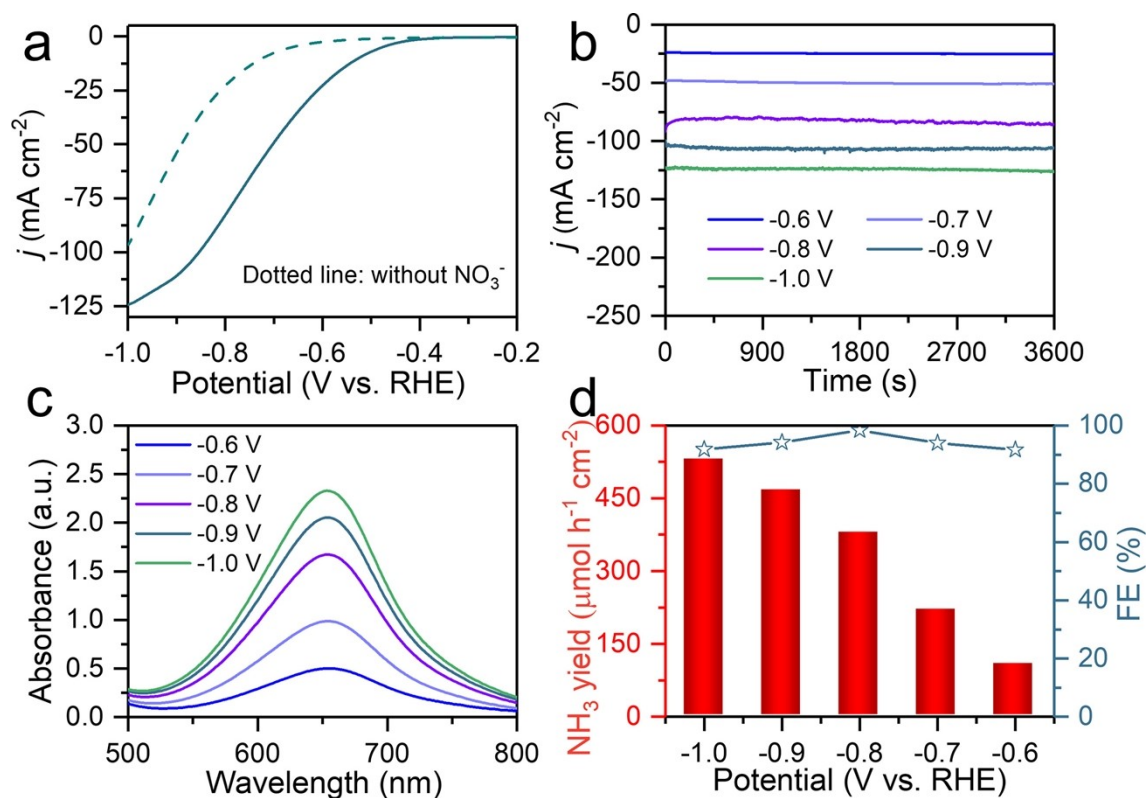

Fig. S9. (a) LSV curves, (b) time-dependent current density curves, (c) corresponding UV spectra, and (d) NH<sub>3</sub> yields and FEs of B-Co<sub>3</sub>O<sub>4</sub>/TM for the NO<sub>3</sub><sup>-</sup>RR in 0.1 M PBS with 0.1 M NO<sub>3</sub><sup>-</sup> at different potentials.

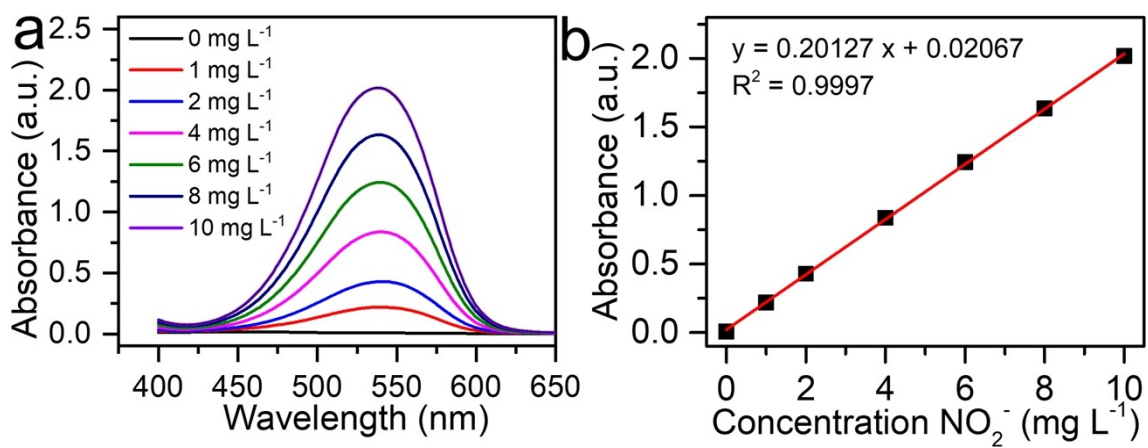

Fig. S10. (a) UV spectra and (b) calibration curve for determining  $\text{NO}_2^-$ .

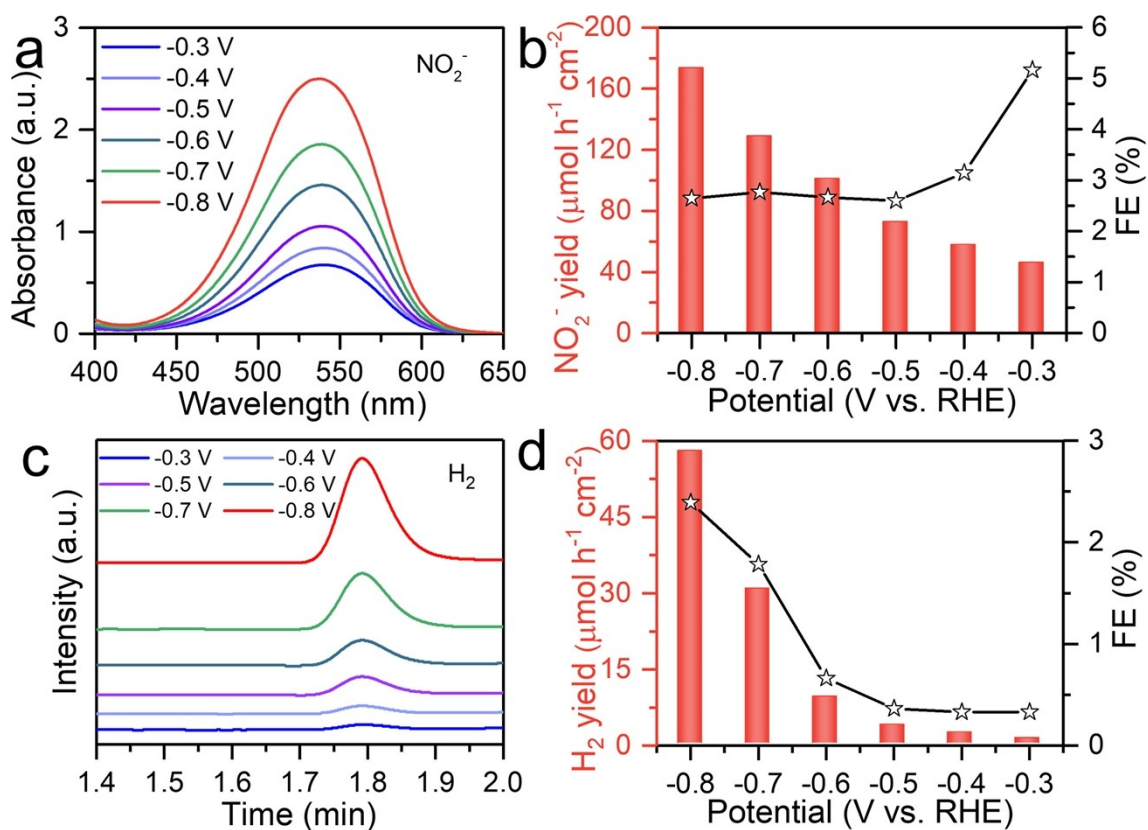

Fig. S11. (a) UV spectra and (b) yields and FEs of electrogenerated NO<sub>2</sub><sup>-</sup>. (c) The H<sub>2</sub> spectra measured by GC and (d) yields and FEs of electrogenerated H<sub>2</sub> for B-Co<sub>3</sub>O<sub>4</sub>/TM at different potentials.

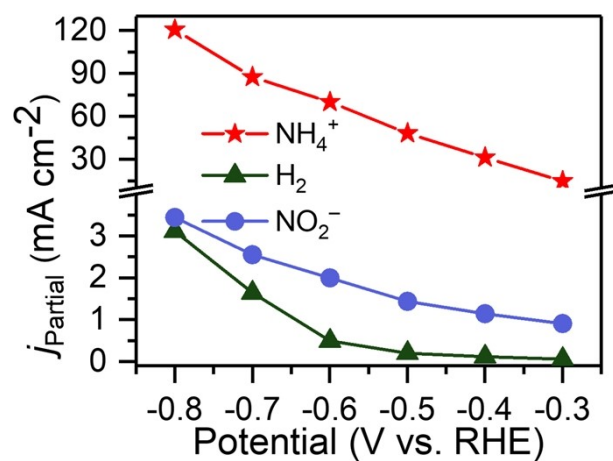

Fig. S12. Partial current densities of  $\text{NH}_4^+$ ,  $\text{NO}_2^-$ , and  $\text{H}_2$  for B- $\text{Co}_3\text{O}_4/\text{TM}$  at different potentials.



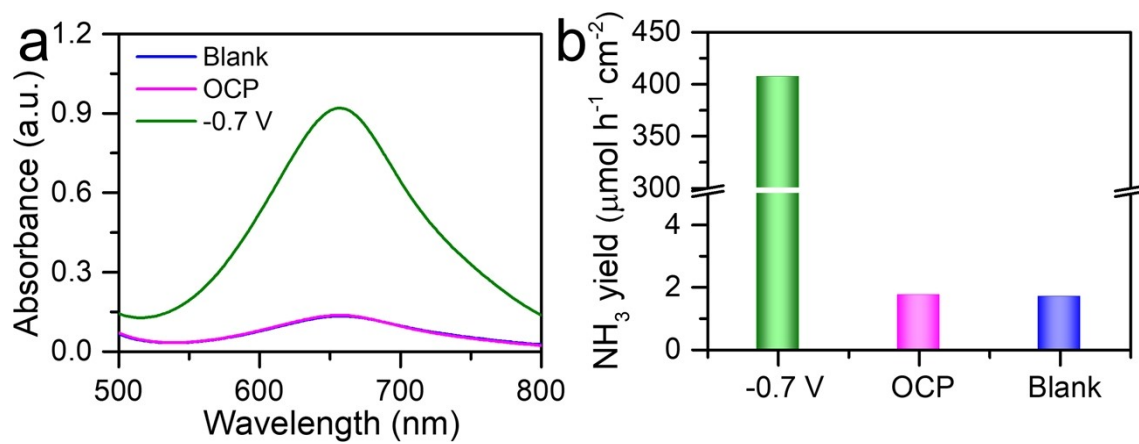

Fig. S13. (a) UV spectra and (b) yields of B-Co<sub>3</sub>O<sub>4</sub>/TM for the NO<sub>3</sub><sup>-</sup>RR at different conditions.

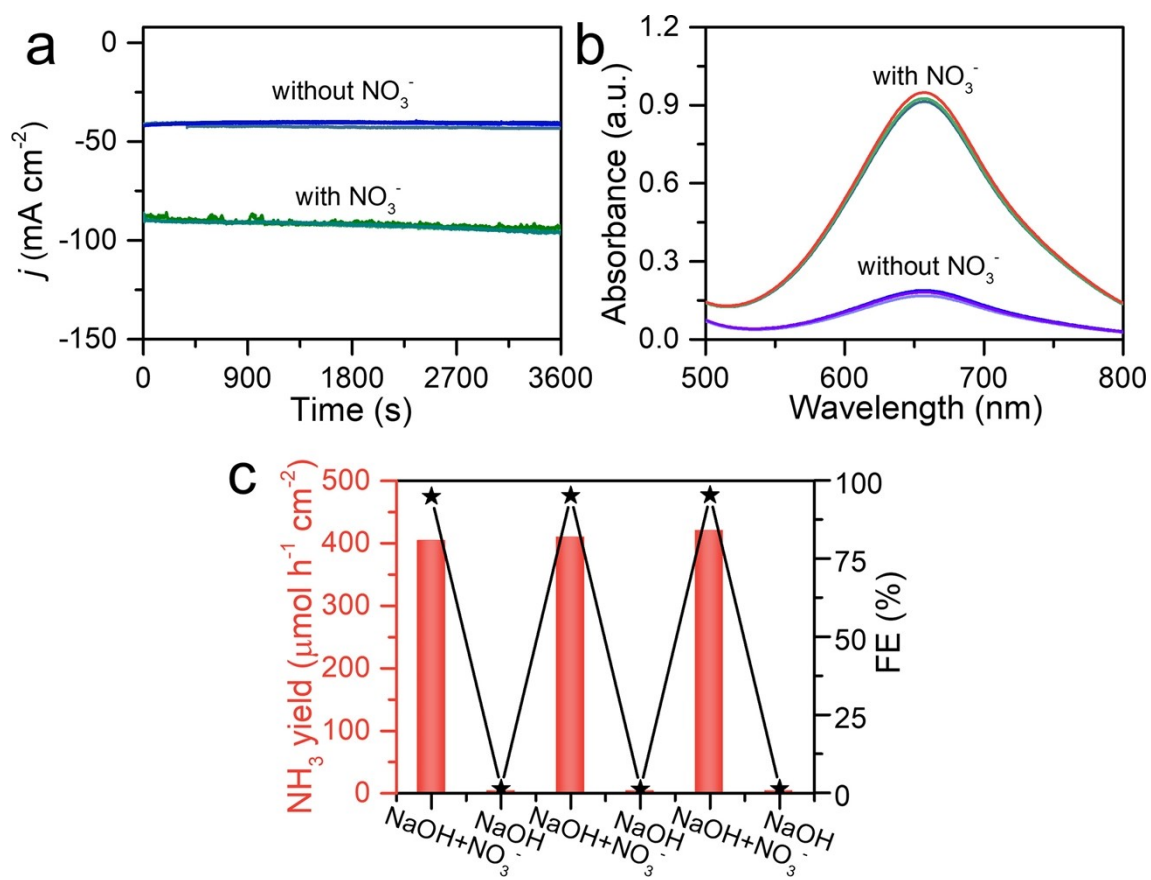

Fig. S14. (a) Time-dependent current density curves, (b) corresponding UV spectra, and (c) NH<sub>3</sub> yields and FEs of B-Co<sub>3</sub>O<sub>4</sub>/TM for during the alternating cycles tests between 0.1 M NaOH with and without 0.1 M NO<sub>3</sub><sup>-</sup>.

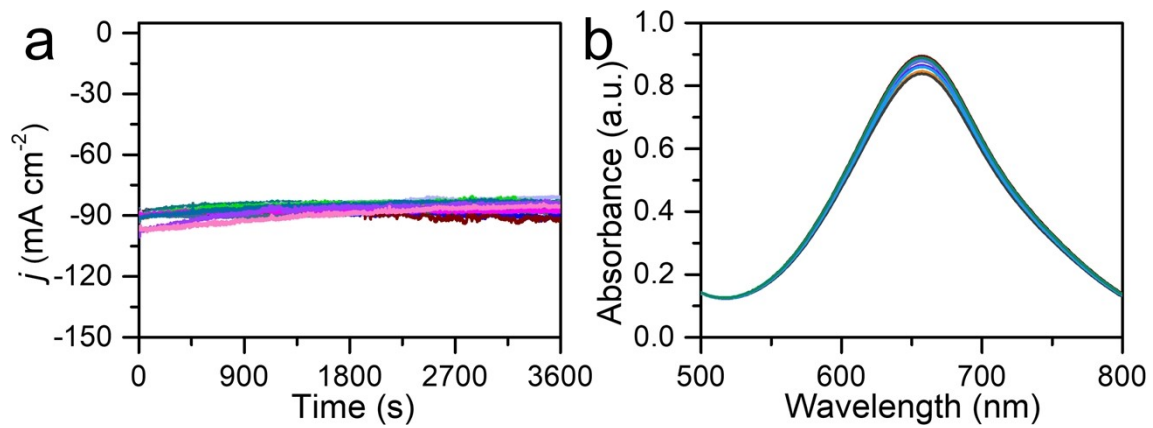

Fig. S15. (a) Time-dependent current density curves and (b) corresponding UV spectra of B-Co<sub>3</sub>O<sub>4</sub>/TM during recycling tests at -0.7 V.

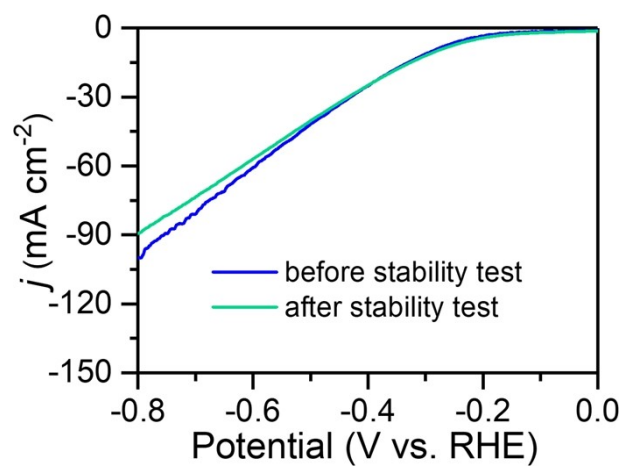

Fig. S16. LSV curves before and after long-time test for B-Co<sub>3</sub>O<sub>4</sub>/TM.

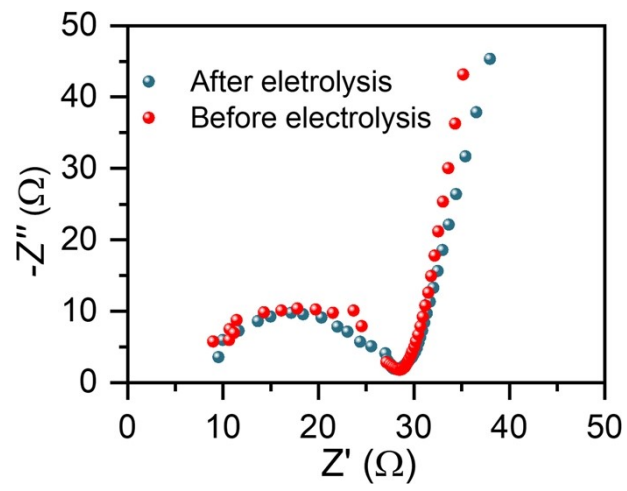

Fig. S17. EIS spectra for B-Co<sub>3</sub>O<sub>4</sub>/TM before and after the electrolysis.

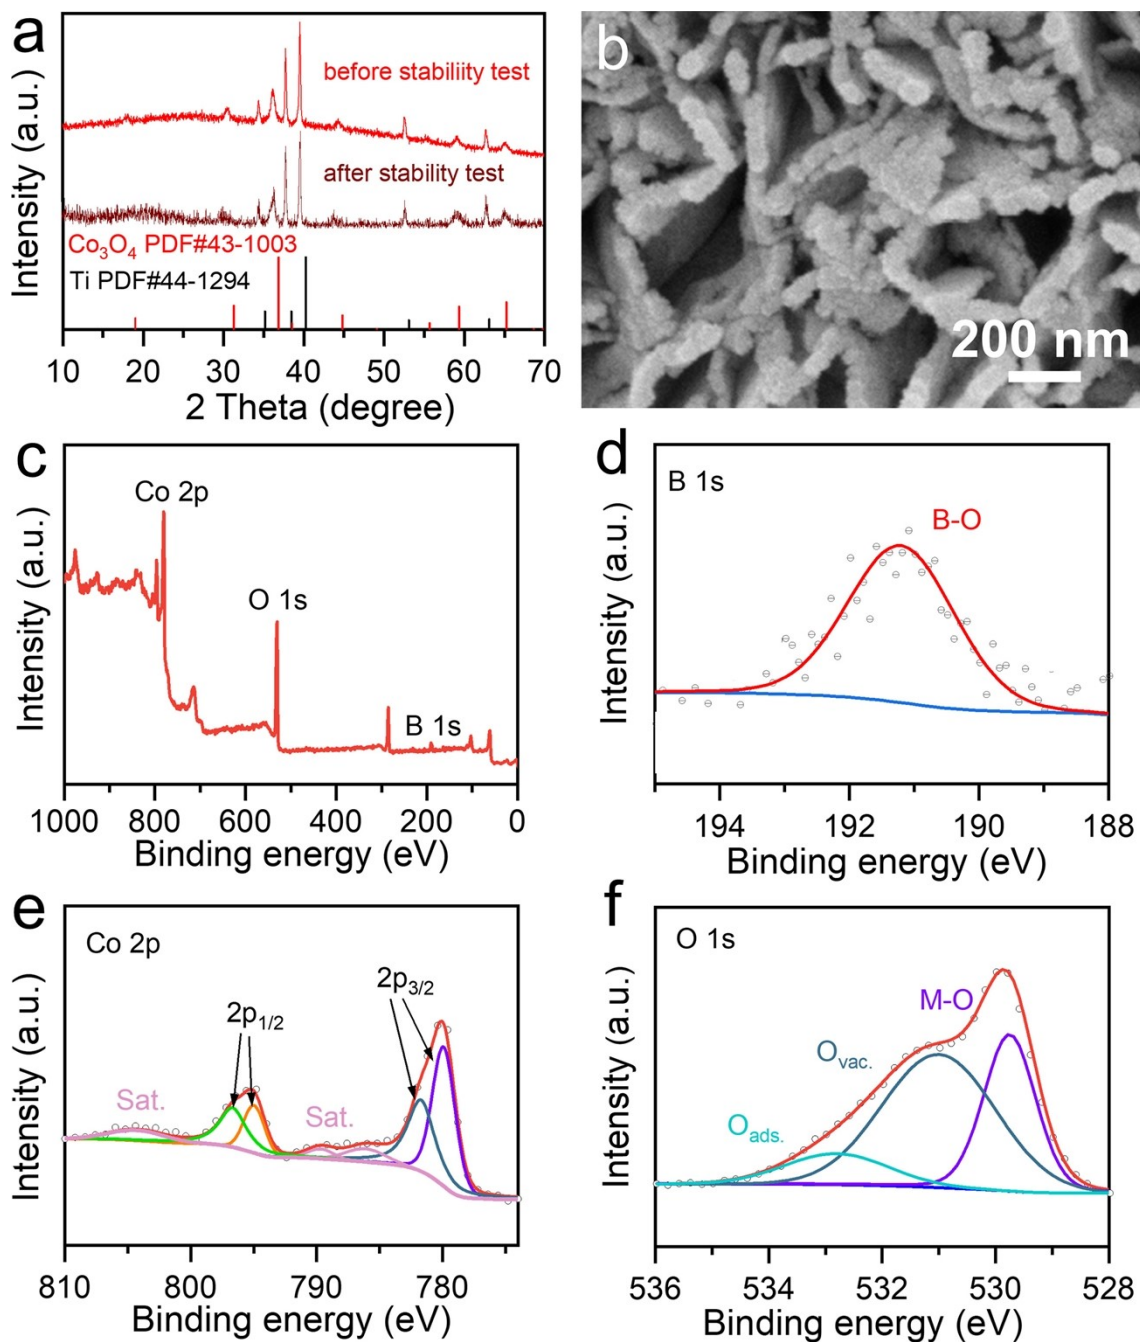

Fig. S18. (a) XRD pattern, (b) SEM image, high-resolution XPS spectra in (c) full spectrum, (d) B 1s region, (e) Co 2p region, and (f) O 1s region of B-Co<sub>3</sub>O<sub>4</sub>/TM after long-time test.

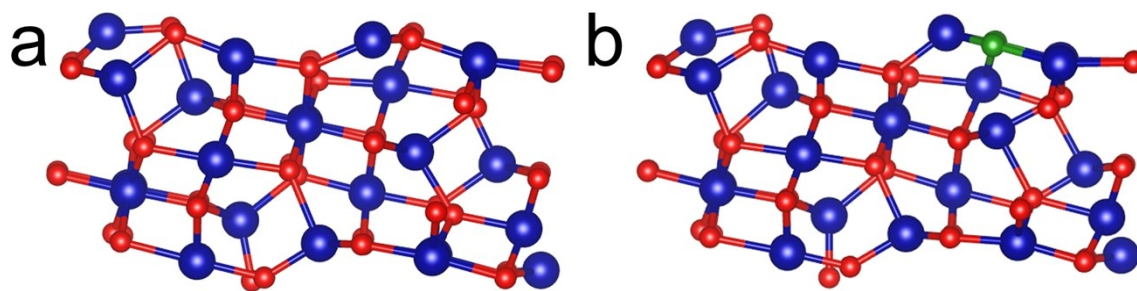

Fig. S19. Crystal structures of (a)  $\text{Co}_3\text{O}_4$  and (b)  $\text{B-Co}_3\text{O}_4$ . Blue, red, and green spheres denote the Co, O, and B atoms, respectively.

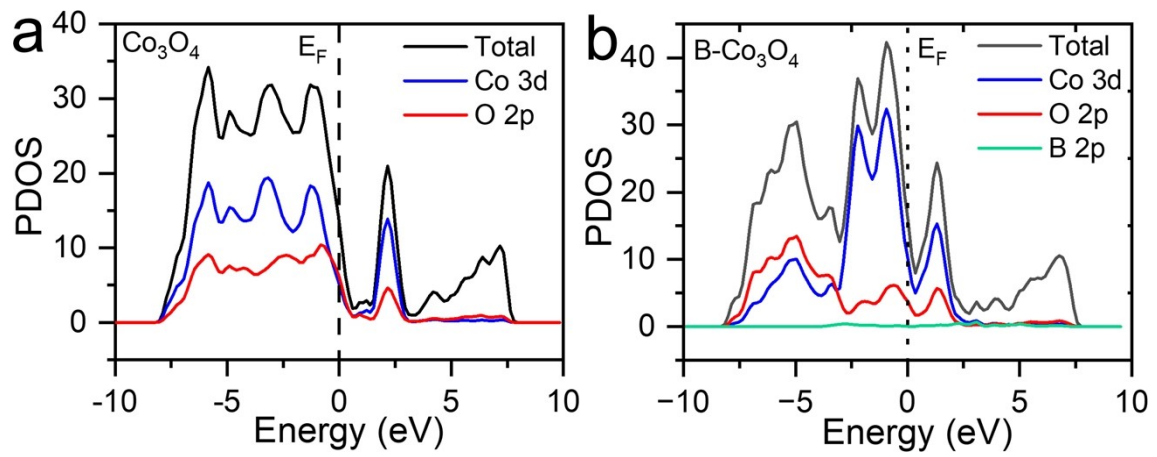

Fig. S20. Calculated PDOS of (a)  $\text{Co}_3\text{O}_4$  and (b)  $\text{B-Co}_3\text{O}_4$  configuration.



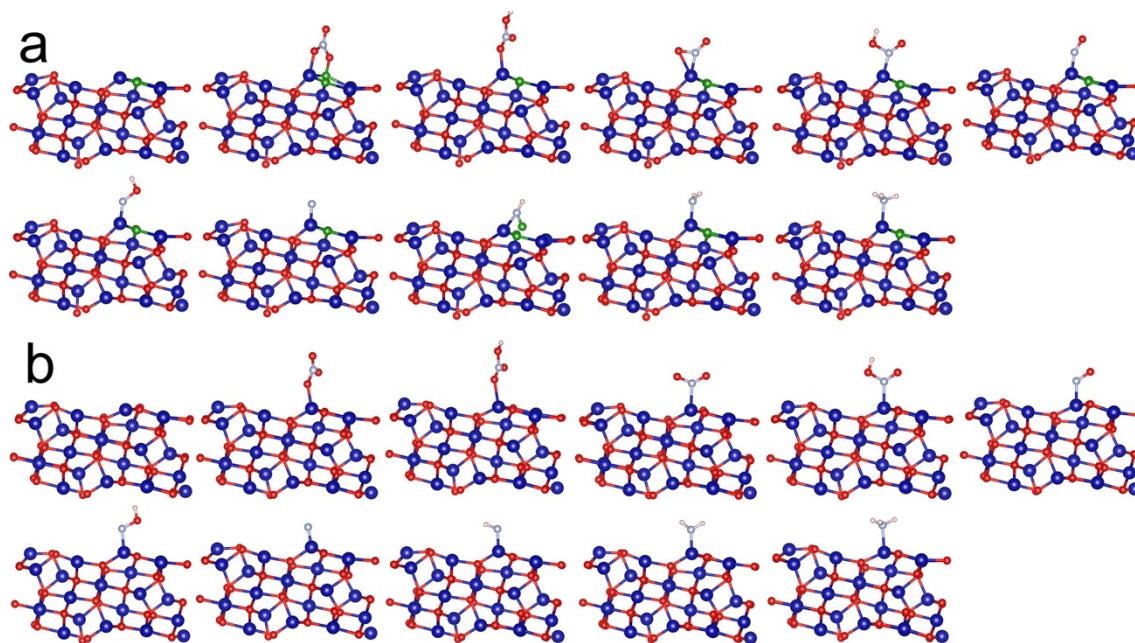

Fig. S21. Atomic structures of the reaction intermediates during the  $\text{NO}_3^-$ -RR on the (a) B- $\text{Co}_3\text{O}_4$  and (b)  $\text{Co}_3\text{O}_4$  surface. Blue, red, green, and silver spheres denote the Co, O, B, and N atoms, respectively.

**Table S1.** Comparison of catalytic performances for B-Co<sub>3</sub>O<sub>4</sub>/TM with other reported NO<sub>3</sub><sup>-</sup>RR electrocatalysts.

| Catalyst                                             | Electrolyte                                                                   | NH <sub>3</sub> yield @ Potential<br>( $\mu\text{mol h}^{-1} \text{cm}^{-2}$ @ V vs. RHE) | FE @ Potential<br>(% @ V vs. RHE) | Ref.      |
|------------------------------------------------------|-------------------------------------------------------------------------------|-------------------------------------------------------------------------------------------|-----------------------------------|-----------|
| B-Co <sub>3</sub> O <sub>4</sub> /TM                 | 0.1 M NaOH (0.1 M NO <sub>3</sub> <sup>-</sup> )                              | 407.3 @ -0.7                                                                              | 94.7 @ -0.7                       | This Work |
| O-Cu-PTCDA                                           | 0.1 M PBS (500 ppm NO <sub>3</sub> <sup>-</sup> )                             | 25.65 @ -0.4                                                                              | 85.9 @ -0.4                       | [6]       |
| Co-P/TP                                              | 0.2 M PBS (200 ppm NO <sub>3</sub> <sup>-</sup> )                             | 24.47 @ -0.6                                                                              | 93.6 @ -0.3                       | [7]       |
| NiFe hydroxide                                       | 0.1 M K <sub>2</sub> SO <sub>4</sub> (200 ppm NO <sub>3</sub> <sup>-</sup> )  | 216 @ -0.75                                                                               | 74.8 @ -0.75                      | [8]       |
| Mn <sub>3</sub> O <sub>4</sub> /CuO <sub>x</sub> /CF | 0.5 M Na <sub>2</sub> SO <sub>4</sub> (200 ppm NO <sub>3</sub> <sup>-</sup> ) | 178.0 @ -0.85                                                                             | 86.55 @ -0.85                     | [9]       |
| Cu <sub>SA</sub> NPC                                 | 0.01 M PBS (500 ppm NO <sub>3</sub> <sup>-</sup> )                            | 153 @ -1.1                                                                                | 87.2 @ -1.1                       | [10]      |
| BC2N/Pd                                              | 0.1 M KOH (250 mM NO <sub>3</sub> <sup>-</sup> )                              | 101.8 @ -0.7                                                                              | 97.42 @ -0.3                      | [11]      |
| Co/CoO NSA                                           | 0.1 M Na <sub>2</sub> SO <sub>4</sub> (200 ppm NO <sub>3</sub> <sup>-</sup> ) | 194.46 @ -0.65                                                                            | 93.8 @ -0.65                      | [12]      |
| PdCoO/NF                                             | 0.5 M K <sub>2</sub> SO <sub>4</sub> (200 ppm NO <sub>3</sub> <sup>-</sup> )  | 221.8 @ -1.5                                                                              | 88.6 @ -1.3                       | [13]      |
| Fe SAC                                               | 0.10 M K <sub>2</sub> SO <sub>4</sub> (0.50 M NO <sub>3</sub> <sup>-</sup> )  | 460 @ -0.85                                                                               | 75 @ -0.66                        | [14]      |
| Rh NFs                                               | 0.1 M Na <sub>2</sub> SO <sub>4</sub> (0.1 M NO <sub>3</sub> <sup>-</sup> )   | 13.5 @ 0.2                                                                                | 95 @ 0.2                          | [15]      |
| Cu/Cu <sub>2</sub> O NWAs                            | 0.5 M Na <sub>2</sub> SO <sub>4</sub> (200 ppm NO <sub>3</sub> <sup>-</sup> ) | 244.9 @ -0.85                                                                             | 95.8 @ -0.85                      | [16]      |
| Ni <sub>3</sub> N/N-C-800                            | 0.5 M Na <sub>2</sub> SO <sub>4</sub> (0.05 M NO <sub>3</sub> <sup>-</sup> )  | 277.5 @ -0.795                                                                            | 85 @ -0.795                       | [17]      |
| PdMoCu                                               | 1 M KOH (0.1 M NO <sub>3</sub> <sup>-</sup> )                                 | 250.4 @ -0.6                                                                              | 56.95 @ -0.6                      | [18]      |
| pCuO-5                                               | 0.05 M H <sub>2</sub> SO <sub>4</sub> (0.05 M NO <sub>3</sub> <sup>-</sup> )  | 292 @ -0.6                                                                                | 89 @ -0.5                         | [19]      |
| Fe-PPy SACs                                          | 0.1 M KOH (0.1 M NO <sub>3</sub> <sup>-</sup> )                               | 161.76 @ -0.7                                                                             | 100 @ -0.5, -0.6                  | [20]      |
| Ni <sub>3</sub> B@NiB <sub>2.74</sub>                | 0.1 M KOH (0.1 M NO <sub>3</sub> <sup>-</sup> )                               | 198.3 @ -0.2                                                                              | 100 @ -0.2                        | [21]      |
| Cu <sub>50</sub> Ni <sub>50</sub> /PTFE              | 1 M KOH (0.1 M NO <sub>3</sub> <sup>-</sup> )                                 | /                                                                                         | 99±1 @ -0.15                      | [22]      |
| In-S-G                                               | 1 M KOH (0.1 M NO <sub>3</sub> <sup>-</sup> )                                 | 74.82 @ -0.5                                                                              | 75 @ -0.5                         | [23]      |
| CoP NWAs/NF                                          | 0.2 M Na <sub>2</sub> SO <sub>4</sub> (100 ppm NO <sub>3</sub> <sup>-</sup> ) | /                                                                                         | 99.4 @ -0.7                       | [24]      |
| Cu@NF                                                | 1 M KOH (200 ppm NO <sub>3</sub> <sup>-</sup> )                               | 252 @ -0.23                                                                               | 96.6 @ -0.23                      | [25]      |
| Fe <sub>2</sub> O <sub>3</sub> NRs/CC                | 0.5 M K <sub>2</sub> SO <sub>4</sub> (0.1 M NO <sub>3</sub> <sup>-</sup> )    | 328.17 @ -0.9                                                                             | 69.76 @ -0.9                      | [26]      |
| Pd-Co <sub>3</sub> O <sub>4</sub> /TM                | 0.1 M NaOH (0.1 M NO <sub>3</sub> <sup>-</sup> )                              | 745.6 @ -0.6                                                                              | 98.7 @ -0.3                       | [27]      |
| Co <sub>3</sub> O <sub>4</sub> -Mn <sub>2</sub>      | 0.5 M K <sub>2</sub> SO <sub>4</sub> (0.1 M NO <sub>3</sub> <sup>-</sup> )    | 2058.8 @ -1.2                                                                             | 99.5 @ -1.2                       | [28]      |
| Pd/NF                                                | 0.5 M K <sub>2</sub> SO <sub>4</sub> (0.1 M NO <sub>3</sub> <sup>-</sup> )    | 1520 @ -1.4                                                                               | 78 @ -1.4                         | [29]      |

**Table S2.** The relative contents of B-Co<sub>3</sub>O<sub>4</sub>/TM before and after electrolysis by XPS analysis.

| Elements | Before electrolysis<br>(at%) | After electrolysis<br>(at%) |
|----------|------------------------------|-----------------------------|
| B        | 12.8                         | 12.4                        |
| Co       | 16.2                         | 15.1                        |
| O        | 42.4                         | 44.0                        |

## References

- 1 G. Kresse and J. Hafner, Ab initio molecular-dynamics simulation of the liquid-metal-amorphous-semiconductor transition in germanium, *Phys. Rev. B*, 1994, **49**, 14251–14269.
- 2 J. P. Perdew, K. Burke and M. Ernzerhof, Generalized gradient approximation made simple, *Phys. Rev. Lett.*, 1996, **77**, 3865–3868.
- 3 M. Cococcioni and S. de Gironcoli, Linear response approach to the calculation of the effective interaction parameters in the LDA+U method, *Phys. Rev. B*, 2005, **71**, 035105.
- 4 H. J. Monkhorst and J. D. Pack, Special points for Brillouin-zone integrations. *Phys. Rev. B*, 1976, **13**, 5188–5192.
- 5 V. Wang, N. Xu, J. C. Liu, G. Tang and W. T. Geng, VASPKIT: a user-friendly interface facilitating high-throughput computing and analysis using VASP code. *Comput. Phys. Commun.*, 2021, **267**, 108033.
- 6 G. F. Chen, Y. Yuan, H. Jiang, S. Y. Ren, L. X. Ding, L. Ma, T. Wu, J. Lu and H. Wang, Electrochemical reduction of nitrate to ammonia via direct eight-electron transfer using a copper-molecular solid catalyst, *Nat. Energy*, 2020, **5**, 605–613.
- 7 Z. Li, G. Wen, J. Liang, T. Li, Y. Luo, Q. Kong, X. Shi, A. M. Asiri, Q. Liu and X. Sun, High-efficiency nitrate electroreduction to ammonia on electrodeposited cobalt-phosphorus alloy film. *Chem. Commun.*, 2021, **57**, 9720–9723.

- 8 X. Wu, A. Ma, J. Hu, D. Liu, A. T. Kuvarega, B. B. Mamba and J. Gui, Amorphous nickel–iron hydroxide nanosheets for effective electroreduction of nitrate to ammonia. *Inorg. Chem. Front.*, 2023, **10**, 666–674.
- 9 J. Hu, A. Ma, X. Wu, Y. Yin, D. Liu, A. T. Kuvarega, B. B. Mamba and J. Gui, Mn<sub>3</sub>O<sub>4</sub>/CuO<sub>x</sub> heterostructure for nitrate electroreduction to ammonia. *Chem. Commun.*, 2023, **59**, 7232–7235.
- 10 X. Zhao, Q. Geng, F. Dong, K. Zhao, S. Chen, H. Yu and X. Quan, Boosting the selectivity and efficiency of nitrate reduction to ammonia with a single-atom Cu electrocatalyst, *Chem. Eng. J.*, 2023, **466**, 143314.
- 11 X. Li, X. Zhao, Y. Zhou, J. Hu, H. Zhang, X. Hu and G. Hu, Pd nanocrystals embedded in BC<sub>2</sub>N for efficient electrochemical conversion of nitrate to ammonia. *Appl. Surf. Sci.*, 2023, **584**, 152556.
- 12 Y. Yu, C. Wang, Y. Yu, Y. Wang and B. Zhang, Promoting selective electroreduction of nitrates to ammonia over electron-deficient Co modulated by rectifying Schottky contacts. *Sci. China Chem.*, 2020, **63**, 1469–1476.
- 13 M. Liu, Q. Mao, K. Shi, Z. Wang, Y. Xu, X. Li, L. Wang and H. Wang, Electroreduction of nitrate to ammonia on palladium–cobalt–oxygen nanowire arrays. *ACS Appl. Mater. Interfaces*, 2022, **14**, 13169–13176.
- 14 Z. Y. Wu, M. Karamad, X. Yong, Q. Huang, D. A. Cullen, P. Zhu, C. Xia, Q. Xiao, M. Shakouri, F. Y. Chen, J. Y. T. Kim, Y. Xia, K. Heck, Y. Hu, M. S. Wong, Q. Li, I. Gates, S. Siahrostami and H. Wang, Electrochemical ammonia synthesis via nitrate reduction on Fe single atom catalyst. *Nat. Commun.* 2021, **12**, 2870.

- 15 H. Liu, J. Timoshenko, L. Bai, Q. Li, M. Rüscher, C. Sun, B. R. Cuenya and J. Luo, Low-coordination rhodium catalysts for an efficient electrochemical nitrate reduction to ammonia. *ACS Catal.*, 2023, **13**, 1513–1521.
- 16 Y. Wang, W. Zhou, R. Jia, Y. Yu and B. Zhang, Unveiling the activity origin of a copper-based electrocatalyst for selective nitrate reduction to ammonia. *Angew. Chem. Int. Ed.*, 2020, **59**, 5350–5354.
- 17 X. Zhang, G. Ma, L. Shui, G. Zhou and X. Wang, Ni<sub>3</sub>N nanoparticles on porous nitrogen-doped carbon nanorods for nitrate electroreduction. *Chem. Eng. J.*, 2022, **430**, 132666.
- 18 X. Tong, Z. Zhang, Z. Fang, J. Guo, Y. Zheng, X. Liang, R. Liu, L. Zhang and W. Chen, PdMoCu trimetallenes for nitrate electroreduction to ammonia. *J. Phys. Chem. C*, 2023, **127**, 5262–5270.
- 19 R. Daiyan, T. Tran-Phu, P. Kumar, K. Iputera, Z. Tong, J. Leverett, M. H. A. Khan, A. A. Esmailpour, A. Jalili, M. Lim, A. Tricoli, R. S. Liu, X. Lu, E. Lovell and R. Amal, Nitrate reduction to ammonium: from CuO defect engineering to waste NO<sub>x</sub>-to-NH<sub>3</sub> economic feasibility. *Energy Environ. Sci.*, 2021, **14**, 3588–3598.
- 20 P. Li, Z. Jin, Z. Fang and G. Yu, A single-site iron catalyst with preoccupied active centers that achieves selective ammonia electrosynthesis from nitrate. *Energy Environ. Sci.*, 2021, **14**, 3522–3531.
- 21 L. Li, C. Tang, X. Cui, Y. Zheng, X. Wang, H. Xu, S. Zhang, T. Shao, K. Davey and S. Z. Qiao, Efficient nitrogen fixation to ammonia through integration of

- plasma oxidation with electrocatalytic reduction. *Angew. Chem. Int. Ed.*, 2021, **60**, 14131–14137.
- 22 Y. Wang, A. Xu, Z. Wang, L. Huang, J. Li, F. Li, J. Wicks, M. Luo, D. H. Nam, C. S. Tan, Y. Ding, J. Wu, Y. Lum, C. T. Dinh, D. Sinton, G. Zheng and E. H. Sargent, Enhanced nitrate-to-ammonia activity on copper-nickel alloys via tuning of intermediate adsorption. *J. Am. Chem. Soc.*, 2020, **142**, 5702–5708.
- 23 F. Lei, W. Xu, J. Yu, K. Li, J. Xie, P. Hao, G. Cui and B. Tang, Electrochemical synthesis of ammonia by nitrate reduction on indium incorporated in sulfur doped graphene, *Chem. Eng. J.*, 2021, **426**, 131317.
- 24 Y. Gao, R. Wang, Y. Li, E. Han, M. Song, Z. Yang, F. Guo, Y. He and X. Yang, Regulating dynamic equilibrium of active hydrogen for super-efficient nitrate electroreduction to ammonia. *Chem. Eng. J.*, 2023, **474**, 145546.
- 25 J. Li, J. Gao, T. Feng, H. Zhang, D. Liu, C. Zhang, S. Huang, C. Wang, F. Du, C. Li and C. Guo, Effect of supporting matrixes on performance of copper catalysts in electrochemical nitrate reduction to ammonia. *J. Power Sources*, 2021, **511**, 230463.
- 26 T. Li, C. Tang, H. Guo, H. Wu, C. Duan, H. Wang, F. Zhang, Y. Cao, G. Yang and Y. Zhou, In situ growth of Fe<sub>2</sub>O<sub>3</sub> nanorod arrays on carbon cloth with rapid charge transfer for efficient nitrate electroreduction to ammonia. *ACS Appl. Mater. Interfaces*, 2022, **14**, 49765–49773.
- 27 X. Fan, C. Liu, Z. Li, Z. Cai, L. Ouyang, Z. Li, X. He, Y. Luo, D. Zheng, S. Sun, Yan Wang, B. Ying, Q. Liu, A. Farouk, M. S. Hamdy, F. Gong, X. Sun and Y.

- Zheng, Pd-doped  $\text{Co}_3\text{O}_4$  nanoarray for efficient eight-electron nitrate electrocatalytic reduction to ammonia synthesis. *Small*, 2023, **19**, 2303424.
- 28 D. Liu, L. Qiao, Y. Chen, P. Zhou, J. Feng, C. C. Leong, K. W. Ng, S. Peng, S. Wang, W. F. Ip and H. Pan, Electrocatalytic reduction of nitrate to ammonia on low-cost manganese-incorporated  $\text{Co}_3\text{O}_4$  nanotubes. *Appl. Catal. B*, 2023, **324**, 122293.
- 29 H. Guo, M. Li, Y. Yang, R. Luo, W. Liu, F. Zhang, C. Tang, G. Yang and Y. Zhou, Self-supported Pd nanorod arrays for high-efficient nitrate electroreduction to ammonia. *Small*, 2023, **19**, 2207743.
